# Supplementary material
Source: PubMed Central journal article supplement (PMC2799789)
Supplement: 0902510106_0902510106SI.pdf [file 0902510106_0902510106SI.pdf]

# Supporting Information

Smith et al. 10.1073/pnas.0902510106

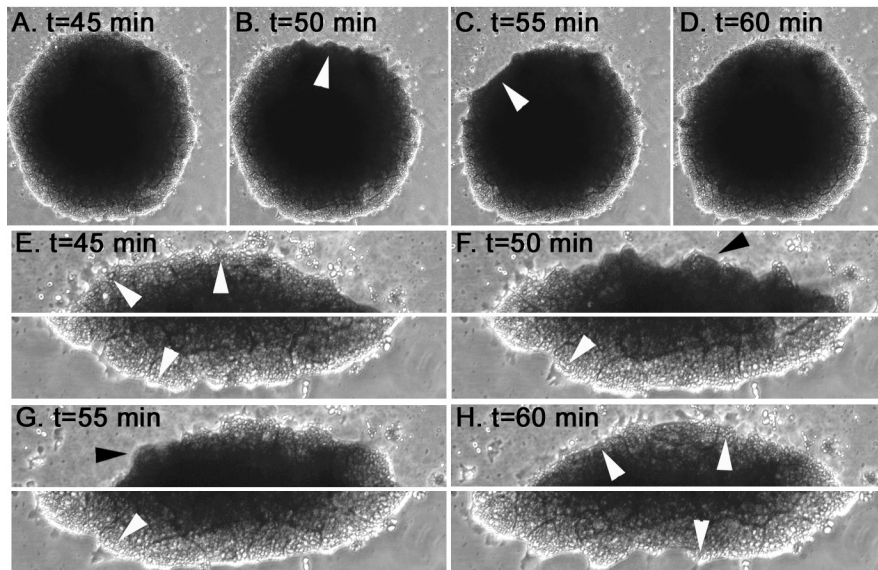

**Fig. S1.** Migration of head mesoderm explants. Time-lapse movies were captured of anterior mesoderm explants for 1 h following plating on their native extracellular matrix in the directed migration assay. A typical explant is shown from time (t) 45–60 min. (A–D) Low magnification images reveal that the explant initially extended cytoplasmic protrusions around its entire circumference. Collapse of the protrusions at the trailing edge (white arrowheads in B and C) was accompanied by the forward movement of the explant. Immediately following this collapse, cytoplasmic protrusions were again extended around the entire circumference of the explant. (E–H) Higher magnification images of the same explant. Examples of cytoplasmic protrusions such as lamellipodia are indicated by white arrowheads. Note the lack of such protrusions at the trailing edge following its collapse (black arrowheads). Initial observations indicate that a similar number of lamellipodia are initially extended at both the leading and trailing edges.

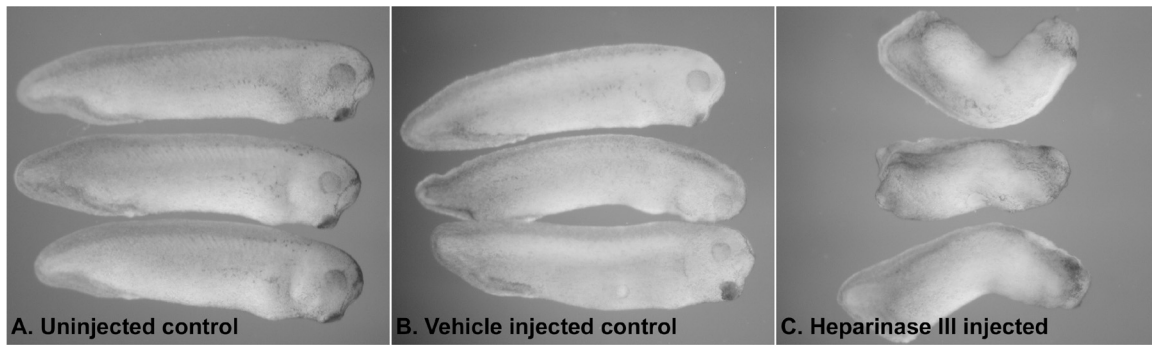

**Fig. S2.** Injection of heparinase III into the blastocoel cavity causes axial and anterior defects as reported in ref. 1. (A) Uninjected embryos. (B) Embryos injected with 25 nL buffer in which heparinase III was diluted. (C) Embryos injected with 25 nL heparinase III ( $1.8 \times 10^{-5}$  units).

1. Brickman MC, Gerhart JC (1994) Heparitinase inhibition of mesoderm induction and gastrulation in *Xenopus laevis* embryos. *Dev Biol* 164:484–501.

**Table S1. Tabulated data of mesendoderm migration assays**

|                      | Total, n | Animal Pole, % | Blastopore Lip, % | Lateral, % | Stalled, % |
|----------------------|----------|----------------|-------------------|------------|------------|
| Untreated control    | 67       | 72             | 7                 | 15         | 6          |
| Heparinase treatment | 39       | 44             | 26                | 20         | 10         |
| Hep post deposition  | 15       | 60             | 13                | 20         | 7          |
